# Supplementary material
Source: PubMed Central journal article supplement (PMC3345004)
Supplement: 1118263109_pnas.201118263SI.pdf [file 1118263109_pnas.201118263SI.pdf]

# Supporting Information

Dearing et al. 10.1073/pnas.1118263109

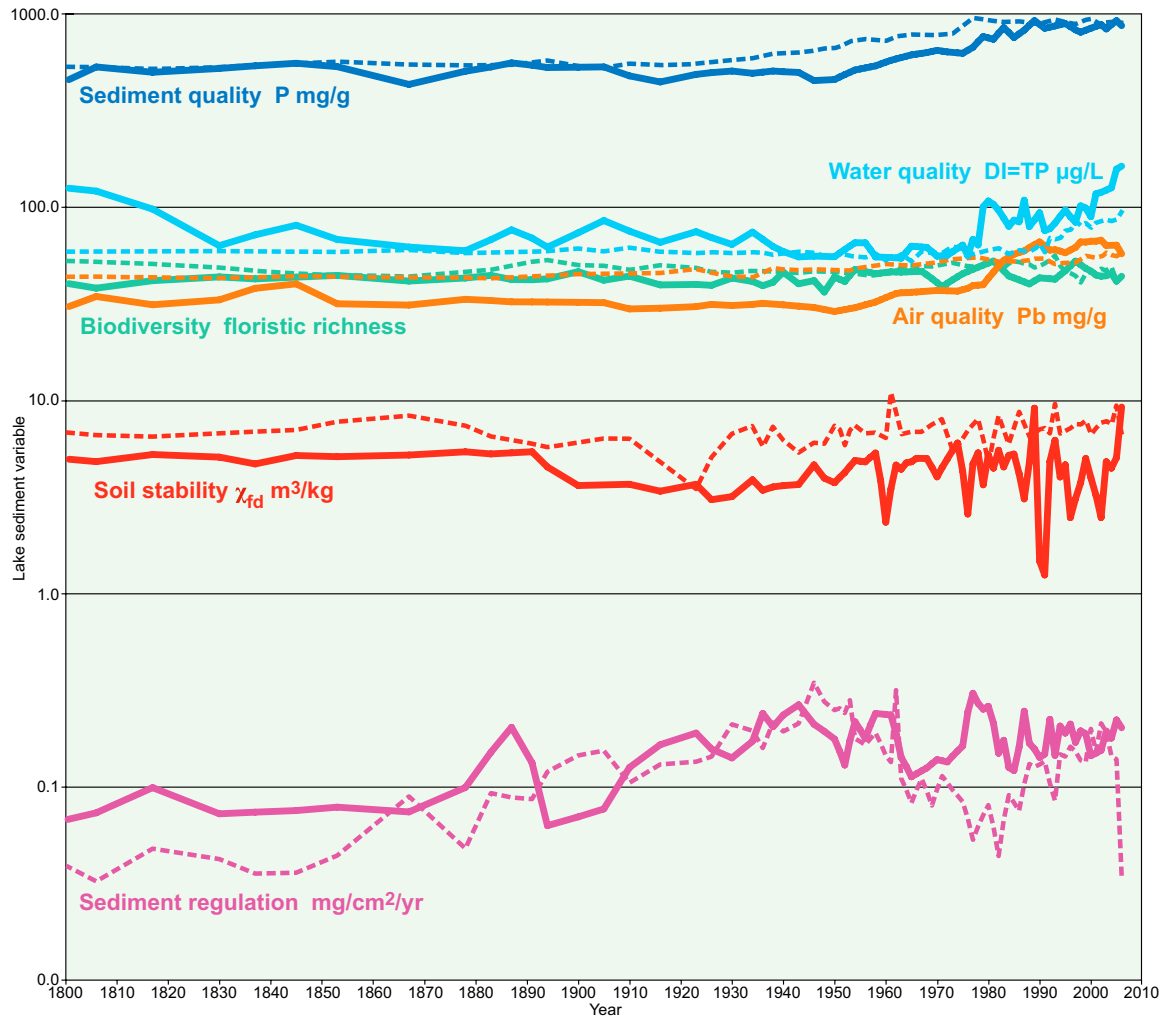

**Fig. S1.** Time series of sediment analytical data 1800–2006 for Chaohu Lake (solid lines) and Taibai Lake (dashed lines), showing pairs of proxies for sediment quality, water quality, sediment regulation, soil stability, air quality, and biodiversity (vertical axis shows values from Table S1 on logarithmic scale).







**Table S3. Complete analytical dataset for dated sediment samples from Chaohu and Taibai lake sediment cores**

| Year | Chaohu                   |                           |                           |                                        |                      |                               | Taibai                   |                           |                           |                                        |                      |                               |
|------|--------------------------|---------------------------|---------------------------|----------------------------------------|----------------------|-------------------------------|--------------------------|---------------------------|---------------------------|----------------------------------------|----------------------|-------------------------------|
|      | P mg/g, sediment quality | DI-TP g/mg, water quality | mg/y, sediment regulation | Xfd m <sup>3</sup> /kg, soil stability | Pb mg/g, air quality | Pollen richness, biodiversity | P mg/g, sediment quality | DI-TP g/mg, water quality | mg/y, sediment regulation | Xfd m <sup>3</sup> /kg, soil stability | Pb mg/g, air quality | Pollen richness, biodiversity |
| 2006 | 875.2                    | 164.0                     | 0.2                       | 9.3                                    | 57.7                 | 44.4                          | 908.6                    | 94.6                      | 0.0                       | 6.7                                    | 58.2                 | 44.1                          |
| 2005 | 929.7                    | 158.2                     | 0.2                       | 5.1                                    | 63.9                 | 41.4                          | 915.4                    | 86.3                      | 0.1                       | 9.4                                    | 56.1                 | 41.6                          |
| 2004 | 885.6                    | 126.6                     | 0.2                       | 4.5                                    | 63.8                 | 49.5                          | 914.0                    | 85.1                      | 0.1                       | 7.6                                    | 57.0                 | 45.6                          |
| 2003 | 841.6                    | 123.2                     | 0.2                       | 4.8                                    | 63.7                 | 47.1                          | 911.7                    | 85.9                      | 0.2                       | 7.9                                    | 58.6                 | 44.4                          |
| 2002 | 886.7                    | 120.1                     | 0.2                       | 2.5                                    | 67.9                 | 48.4                          | 886.9                    | 84.8                      | 0.2                       | 7.7                                    | 56.1                 | 44.2                          |
| 2001 | 867.7                    | 118.0                     | 0.2                       | 3.2                                    | 67.0                 | 46.3                          | 921.6                    | 83.5                      | 0.2                       | 7.2                                    | 54.9                 | 44.8                          |
| 2000 | 848.7                    | 89.8                      | 0.1                       | 4.0                                    | 67.0                 | 46.6                          | 950.0                    | 78.5                      | 0.2                       | 6.7                                    | 55.6                 | 46.9                          |
| 1999 | 829.1                    | 99.6                      | 0.2                       | 5.0                                    | 66.3                 | 45.5                          | 938.4                    | 83.0                      | 0.1                       | 7.9                                    | 56.2                 | 48.5                          |
| 1998 | 809.4                    | 102.2                     | 0.2                       | 3.8                                    | 66.5                 | 40.9                          | 915.9                    | 80.5                      | 0.1                       | 7.5                                    | 54.0                 | 50.7                          |
| 1997 | 832.5                    | 84.1                      | 0.2                       | 3.1                                    | 62.2                 | 44.2                          | 893.4                    | 85.1                      | 0.2                       | 7.6                                    | 51.8                 | 52.9                          |
| 1996 | 865.3                    | 89.8                      | 0.2                       | 2.5                                    | 60.3                 | 45.9                          | 904.3                    | 76.8                      | 0.2                       | 7.2                                    | 51.8                 | 50.0                          |
| 1995 | 898.1                    | 97.2                      | 0.2                       | 4.7                                    | 58.4                 | 47.0                          | 915.1                    | 75.1                      | 0.1                       | 7.0                                    | 51.9                 | 47.1                          |
| 1994 | 885.1                    | 90.2                      | 0.2                       | 4.0                                    | 59.6                 | 50.1                          | 930.2                    | 68.9                      | 0.1                       | 6.8                                    | 51.5                 | 44.9                          |
| 1993 | 872.1                    | 83.1                      | 0.1                       | 6.3                                    | 60.5                 | 56.4                          | 945.3                    | 68.1                      | 0.1                       | 9.6                                    | 51.1                 | 42.6                          |
| 1992 | 860.3                    | 77.8                      | 0.2                       | 4.8                                    | 60.3                 | 53.2                          | 927.5                    | 69.5                      | 0.1                       | 6.8                                    | 52.8                 | 42.9                          |
| 1991 | 848.5                    | 76.1                      | 0.1                       | 1.3                                    | 63.4                 | 51.3                          | 909.7                    | 58.5                      | 0.1                       | 7.2                                    | 54.6                 | 43.1                          |
| 1990 | 889.1                    | 94.1                      | 0.1                       | 1.5                                    | 66.5                 | 49.7                          | 903.4                    | 64.7                      | 0.1                       | 7.1                                    | 54.4                 | 43.3                          |
| 1989 | 929.7                    | 86.5                      | 0.2                       | 9.2                                    | 64.3                 | 49.0                          | 897.2                    | 60.9                      | 0.1                       | 6.7                                    | 54.2                 | 41.8                          |
| 1988 | 879.5                    | 79.8                      | 0.2                       | 4.8                                    | 62.1                 | 50.8                          | 908.7                    | 59.0                      | 0.1                       | 6.5                                    | 53.4                 | 40.3                          |
| 1987 | 829.2                    | 109.3                     | 0.2                       | 3.1                                    | 59.7                 | 51.4                          | 914.5                    | 59.4                      | 0.1                       | 7.6                                    | 53.0                 | 41.3                          |
| 1986 | 794.1                    | 84.4                      | 0.2                       | 4.2                                    | 58.6                 | 52.4                          | 920.3                    | 59.8                      | 0.1                       | 8.7                                    | 52.6                 | 42.3                          |
| 1985 | 759.0                    | 86.2                      | 0.1                       | 5.3                                    | 57.4                 | 52.8                          | 919.0                    | 58.5                      | 0.1                       | 7.4                                    | 52.6                 | 43.3                          |
| 1984 | 807.3                    | 80.1                      | 0.1                       | 5.2                                    | 55.4                 | 51.2                          | 917.7                    | 57.2                      | 0.1                       | 6.0                                    | 52.7                 | 44.3                          |
| 1983 | 855.5                    | 88.3                      | 0.2                       | 4.5                                    | 53.3                 | 48.8                          | 916.4                    | 59.2                      | 0.1                       | 7.2                                    | 52.7                 | 47.2                          |
| 1982 | 799.8                    | 97.0                      | 0.1                       | 5.5                                    | 49.8                 | 50.5                          | 915.1                    | 61.3                      | 0.0                       | 8.3                                    | 52.7                 | 50.0                          |
| 1981 | 744.1                    | 104.0                     | 0.2                       | 4.5                                    | 46.3                 | 51.8                          | 925.9                    | 60.7                      | 0.1                       | 6.4                                    | 53.3                 | 52.9                          |
| 1980 | 756.4                    | 108.3                     | 0.3                       | 5.3                                    | 43.1                 | 51.8                          | 936.7                    | 60.1                      | 0.1                       | 4.5                                    | 54.0                 | 51.7                          |
| 1979 | 768.8                    | 101.0                     | 0.3                       | 3.7                                    | 39.9                 | 50.3                          | 943.9                    | 59.3                      | 0.1                       | 6.3                                    | 54.6                 | 50.4                          |
| 1978 | 722.5                    | 64.1                      | 0.3                       | 5.4                                    | 39.7                 | 49.5                          | 951.1                    | 58.4                      | 0.1                       | 8.1                                    | 55.2                 | 49.2                          |
| 1977 | 676.2                    | 68.5                      | 0.3                       | 4.7                                    | 39.5                 | 49.5                          | 958.3                    | 57.5                      | 0.1                       | 7.6                                    | 55.0                 | 48.0                          |
| 1976 | 652.9                    | 56.3                      | 0.2                       | 2.6                                    | 38.2                 | 49.8                          | 917.3                    | 59.1                      | 0.1                       | 7.0                                    | 54.8                 | 46.7                          |
| 1975 | 629.6                    | 64.0                      | 0.2                       | 4.3                                    | 37.6                 | 50.5                          | 876.2                    | 60.7                      | 0.1                       | 6.4                                    | 54.7                 | 45.5                          |
| 1974 | 633.1                    | 61.5                      | 0.2                       | 6.0                                    | 37.0                 | 51.0                          | 835.1                    | 61.6                      | 0.1                       | 6.0                                    | 54.4                 | 43.9                          |
| 1973 | 636.5                    | 59.1                      | 0.1                       | 5.5                                    | 37.0                 | 51.7                          | 794.0                    | 62.6                      | 0.1                       | 5.5                                    | 54.1                 | 42.2                          |
| 1972 | 640.0                    | 56.6                      | 0.1                       | 5.0                                    | 37.1                 | 51.2                          | 791.4                    | 60.5                      | 0.1                       | 6.8                                    | 53.4                 | 40.6                          |
| 1971 | 646.1                    | 56.4                      | 0.1                       | 4.5                                    | 37.2                 | 50.6                          | 788.7                    | 58.4                      | 0.1                       | 8.0                                    | 52.8                 | 39.0                          |
| 1970 | 652.1                    | 56.1                      | 0.1                       | 4.0                                    | 37.3                 | 50.1                          | 786.0                    | 58.3                      | 0.1                       | 7.8                                    | 52.1                 | 40.9                          |
| 1969 | 643.6                    | 59.2                      | 0.1                       | 4.5                                    | 37.1                 | 49.6                          | 783.3                    | 58.1                      | 0.1                       | 7.6                                    | 51.5                 | 42.9                          |
| 1968 | 635.0                    | 62.3                      | 0.1                       | 5.0                                    | 36.9                 | 49.7                          | 783.5                    | 58.7                      | 0.1                       | 7.2                                    | 51.2                 | 44.9                          |
| 1967 | 629.3                    | 62.6                      | 0.1                       | 5.0                                    | 36.8                 | 49.8                          | 783.7                    | 59.3                      | 0.1                       | 6.9                                    | 50.9                 | 46.8                          |
| 1966 | 623.5                    | 62.9                      | 0.1                       | 5.0                                    | 36.6                 | 50.0                          | 783.8                    | 55.9                      | 0.1                       | 6.9                                    | 50.6                 | 46.7                          |
| 1965 | 617.8                    | 63.2                      | 0.1                       | 4.8                                    | 36.5                 | 50.1                          | 784.0                    | 52.5                      | 0.1                       | 6.9                                    | 50.3                 | 46.6                          |
| 1964 | 608.1                    | 59.0                      | 0.1                       | 4.8                                    | 36.3                 | 50.2                          | 779.1                    | 54.8                      | 0.1                       | 6.8                                    | 50.4                 | 46.5                          |
| 1963 | 598.4                    | 54.8                      | 0.1                       | 4.4                                    | 36.3                 | 48.7                          | 774.3                    | 57.1                      | 0.1                       | 6.7                                    | 50.5                 | 46.4                          |
| 1962 | 588.7                    | 55.0                      | 0.2                       | 4.7                                    | 35.9                 | 47.0                          | 764.5                    | 55.5                      | 0.3                       | 9.1                                    | 50.7                 | 46.5                          |
| 1961 | 579.0                    | 55.2                      | 0.2                       | 3.5                                    | 35.1                 | 45.9                          | 747.7                    | 56.6                      | 0.1                       | 11.0                                   | 50.9                 | 46.5                          |
| 1960 | 566.6                    | 55.3                      | 0.2                       | 2.4                                    | 34.2                 | 45.5                          | 730.8                    | 53.5                      | 0.1                       | 6.4                                    | 51.1                 | 46.2                          |
| 1959 | 554.2                    | 55.4                      | 0.2                       | 3.9                                    | 33.3                 | 45.2                          | 735.8                    | 55.7                      | 0.2                       | 6.6                                    | 50.6                 | 45.8                          |
| 1958 | 541.8                    | 55.6                      | 0.2                       | 5.4                                    | 32.5                 | 44.9                          | 740.7                    | 57.9                      | 0.2                       | 6.8                                    | 50.1                 | 45.5                          |
| 1957 | 535.3                    | 60.7                      | 0.2                       | 5.1                                    | 31.9                 | 44.5                          | 745.6                    | 56.6                      | 0.2                       | 6.8                                    | 49.6                 | 46.1                          |
| 1956 | 528.8                    | 65.8                      | 0.2                       | 4.8                                    | 31.4                 | 44.8                          | 750.5                    | 55.3                      | 0.2                       | 6.8                                    | 49.1                 | 46.7                          |
| 1955 | 522.3                    | 65.8                      | 0.2                       | 4.9                                    | 30.9                 | 45.3                          | 743.6                    | 55.5                      | 0.2                       | 7.1                                    | 48.7                 | 47.3                          |
| 1954 | 515.8                    | 65.8                      | 0.2                       | 4.9                                    | 30.3                 | 45.6                          | 736.6                    | 55.7                      | 0.2                       | 7.5                                    | 48.2                 | 47.9                          |
| 1953 | 502.0                    | 63.2                      | 0.2                       | 4.6                                    | 30.0                 | 45.8                          | 722.6                    | 56.1                      | 0.3                       | 7.0                                    | 47.4                 | 44.7                          |
| 1952 | 488.2                    | 60.7                      | 0.1                       | 4.3                                    | 29.7                 | 45.9                          | 701.8                    | 56.8                      | 0.2                       | 6.0                                    | 47.5                 | 41.5                          |
| 1951 | 474.4                    | 58.2                      | 0.2                       | 4.0                                    | 29.3                 | 46.2                          | 680.9                    | 57.5                      | 0.3                       | 7.1                                    | 47.6                 | 42.6                          |
| 1950 | 460.6                    | 55.7                      | 0.2                       | 3.8                                    | 29.0                 | 46.5                          | 672.0                    | 56.0                      | 0.3                       | 7.4                                    | 47.7                 | 43.7                          |
| 1948 | 457.7                    | 55.9                      | 0.2                       | 4.0                                    | 29.7                 | 46.6                          | 665.6                    | 55.9                      | 0.3                       | 6.0                                    | 47.7                 | 36.6                          |
| 1946 | 454.8                    | 56.1                      | 0.2                       | 4.7                                    | 30.4                 | 46.8                          | 650.1                    | 58.3                      | 0.3                       | 6.1                                    | 47.8                 | 41.9                          |

Table S3. Cont.

| Year | Chaohu                         |                                 |                                 |                                              |                            |                                     | Taibai                         |                                 |                                 |                                              |                            |                                     |
|------|--------------------------------|---------------------------------|---------------------------------|----------------------------------------------|----------------------------|-------------------------------------|--------------------------------|---------------------------------|---------------------------------|----------------------------------------------|----------------------------|-------------------------------------|
|      | P mg/g,<br>sediment<br>quality | DI-TP g/mg,<br>water<br>quality | mg/y,<br>sediment<br>regulation | Xfd m <sup>3</sup> /kg,<br>soil<br>stability | Pb mg/g,<br>air<br>quality | Pollen<br>richness,<br>biodiversity | P mg/g,<br>sediment<br>quality | DI-TP g/mg,<br>water<br>quality | mg/y,<br>sediment<br>regulation | Xfd m <sup>3</sup> /kg,<br>soil<br>stability | Pb mg/g,<br>air<br>quality | Pollen<br>richness,<br>biodiversity |
| 1943 | 501.4                          | 55.6                            | 0.3                             | 3.7                                          | 30.9                       | 46.0                                | 632.9                          | 59.1                            | 0.2                             | 5.4                                          | 47.6                       | 40.3                                |
| 1940 | 505.5                          | 59.2                            | 0.2                             | 3.6                                          | 31.4                       | 46.3                                | 629.2                          | 58.0                            | 0.2                             | 6.3                                          | 47.9                       | 46.4                                |
| 1938 | 509.7                          | 62.9                            | 0.2                             | 3.6                                          | 31.7                       | 47.0                                | 624.6                          | 57.0                            | 0.2                             | 7.3                                          | 48.6                       | 41.1                                |
| 1936 | 502.9                          | 68.6                            | 0.2                             | 3.4                                          | 32.0                       | 47.1                                | 611.1                          | 58.4                            | 0.2                             | 5.9                                          | 46.1                       | 39.5                                |
| 1934 | 496.2                          | 74.7                            | 0.2                             | 3.9                                          | 31.6                       | 47.1                                | 592.3                          | 58.7                            | 0.2                             | 7.4                                          | 43.6                       | 41.5                                |
| 1930 | 509.6                          | 64.5                            | 0.1                             | 3.2                                          | 31.1                       | 46.2                                | 577.8                          | 58.3                            | 0.2                             | 6.7                                          | 44.1                       | 43.2                                |
| 1926 | 500.0                          | 70.0                            | 0.2                             | 3.1                                          | 31.6                       | 46.8                                | 567.8                          | 58.8                            | 0.1                             | 5.1                                          | 46.0                       | 39.6                                |
| 1923 | 489.7                          | 75.1                            | 0.2                             | 3.7                                          | 30.7                       | 48.7                                | 556.6                          | 58.1                            | 0.1                             | 3.5                                          | 48.0                       | 40.0                                |
| 1916 | 447.3                          | 66.1                            | 0.2                             | 3.4                                          | 30.2                       | 50.3                                | 548.2                          | 59.0                            | 0.1                             | 4.9                                          | 46.0                       | 39.8                                |
| 1910 | 481.1                          | 75.6                            | 0.1                             | 3.7                                          | 29.9                       | 47.8                                | 555.6                          | 61.7                            | 0.1                             | 6.4                                          | 45.7                       | 44.2                                |
| 1905 | 535.3                          | 85.8                            | 0.1                             | 3.7                                          | 32.2                       | 49.9                                | 531.9                          | 59.3                            | 0.2                             | 6.3                                          | 45.3                       | 42.1                                |
| 1900 | 533.3                          | 74.1                            | 0.1                             | 3.6                                          | 32.3                       | 50.6                                | 542.4                          | 61.0                            | 0.1                             | 6.1                                          | 45.2                       | 46.6                                |
| 1894 | 531.3                          | 62.4                            | 0.1                             | 4.5                                          | 32.5                       | 53.4                                | 577.1                          | 59.7                            | 0.1                             | 5.7                                          | 44.5                       | 42.8                                |
| 1891 | 546.5                          | 69.6                            | 0.1                             | 5.4                                          | 32.5                       | 52.5                                | 563.1                          | 59.4                            | 0.1                             | 6.0                                          | 44.1                       | 42.3                                |
| 1887 | 561.7                          | 76.8                            | 0.2                             | 5.4                                          | 32.5                       | 50.1                                | 549.2                          | 59.2                            | 0.1                             | 6.3                                          | 43.6                       | 42.4                                |
| 1883 | 535.0                          | 68.3                            | 0.2                             | 5.3                                          | 33.0                       | 47.6                                | 547.8                          | 58.6                            | 0.1                             | 6.6                                          | 43.0                       | 44.6                                |
| 1878 | 508.3                          | 59.8                            | 0.1                             | 5.4                                          | 33.5                       | 46.5                                | 546.4                          | 58.1                            | 0.0                             | 7.4                                          | 43.4                       | 43.2                                |
| 1867 | 434.5                          | 62.5                            | 0.1                             | 5.2                                          | 31.3                       | 44.1                                | 550.8                          | 60.0                            | 0.1                             | 8.3                                          | 43.6                       | 41.7                                |
| 1853 | 536.8                          | 68.4                            | 0.1                             | 5.1                                          | 31.8                       | 44.7                                | 570.3                          | 59.0                            | 0.0                             | 7.7                                          | 43.8                       | 44.6                                |
| 1845 | 559.1                          | 81.1                            | 0.1                             | 5.2                                          | 40.3                       | 45.6                                | 559.0                          | 59.1                            | 0.0                             | 7.0                                          | 44.2                       | 43.7                                |
| 1837 | 542.3                          | 72.3                            | 0.1                             | 4.7                                          | 38.2                       | 47.1                                | 547.7                          | 59.3                            | 0.0                             | 6.9                                          | 43.6                       | 42.8                                |
| 1830 | 525.5                          | 63.6                            | 0.1                             | 5.1                                          | 33.3                       | 48.9                                | 533.1                          | 59.4                            | 0.0                             | 6.8                                          | 43.1                       | 43.8                                |
| 1817 | 502.2                          | 98.3                            | 0.1                             | 5.3                                          | 31.4                       | 51.1                                | 523.4                          | 59.5                            | 0.0                             | 6.5                                          | 43.6                       | 41.9                                |
| 1806 | 535.1                          | 121.8                           | 0.1                             | 4.8                                          | 34.7                       | 52.4                                | 537.7                          | 59.5                            | 0.0                             | 6.7                                          | 43.9                       | 38.3                                |
| 1794 | 382.5                          | 131.4                           | 0.1                             | 5.2                                          | 26.5                       | 53.9                                | 534.0                          | 59.5                            | 0.0                             | 7.1                                          | 43.6                       | 42.6                                |

P, phosphorus; DI-TP, diatom-inferred total phosphorus; Xfd, frequency-dependent magnetic susceptibility; Pb, lead.

**Table S4. Socioeconomic data for GDP (Anhui Province, Renmimbi), population (mean of lake-catchment counties), arable land area (mean of lake-catchment counties), and modeled mean annual regional temperature and rainfall (sources: refs. 151–155)**

| Year | Gross domestic product: Anhui, RMB $\times 10^8$ | Mean population | Arable land (mu) | Mean annual temperature, $T$ °C | Mean annual rainfall, mm/d |
|------|--------------------------------------------------|-----------------|------------------|---------------------------------|----------------------------|
| 2006 | 6,148.73                                         | 4,667,219       | 3,441,653        | 16.3                            | 3.64                       |
| 2005 | 5,375.84                                         | 4,600,008       | 3,450,638        | 16.3                            | 3.64                       |
| 2004 | 4,759.3                                          | 4,546,044       | 3,454,253        | 16.3                            | 3.64                       |
| 2003 | 3,823.1                                          | 4,499,712       | 3,327,678        | 16.3                            | 3.63                       |
| 2002 | 3,519.72                                         | 4,452,971       | 3,405,314        | 16.3                            | 3.63                       |
| 2001 | 3,246.71                                         | 4,414,202       | 3,496,878        | 16.2                            | 3.62                       |
| 2000 | 2,902.09                                         | 4,382,235       | 3,527,257        | 16.7                            | 2.83                       |
| 1999 | 2,712.34                                         | 4,335,610       | 3,555,400        | 16.4                            | 4.06                       |
| 1998 | 2,542.96                                         | 4,305,283       | 3,572,845        | 17.1                            | 3.44                       |
| 1997 | 2,347.32                                         | 4,279,339       | 3,591,696        | 16.6                            | 2.77                       |
| 1996 | 2,093.3                                          | 4,234,291       | 3,600,616        | 15.8                            | 4.25                       |
| 1995 | 1,810.66                                         | 4,196,371       | 3,607,800        | 16.4                            | 2.93                       |
| 1994 | 1,320.43                                         | 4,148,185       | 3,630,398        | 16.9                            | 2.72                       |
| 1993 | 1,037.14                                         | 4,108,590       | 3,647,708        | 15.6                            | 4.07                       |
| 1992 | 801.16                                           | 3,992,072       | 3,665,321        | 16.0                            | 2.80                       |
| 1991 | 663.6                                            | 4,030,854       | 3,683,007        | 16.0                            | 5.17                       |
| 1990 | 658.02                                           | 3,981,574       | 3,692,406        | 15.9                            | 3.17                       |
| 1989 | 616.25                                           | 3,898,650       | 3,700,076        | 15.5                            | 4.26                       |
| 1988 | 546.94                                           | 3,837,051       | 3,707,206        | 15.9                            | 3.34                       |
| 1987 | 442.35                                           | 3,774,678       | 3,684,575        | 15.7                            | 4.01                       |
| 1986 | 382.76                                           | 3,739,080       | 3,680,693        | 15.7                            | 3.53                       |
| 1985 | 331.24                                           | 3,690,763       | 3,689,662        | 15.9                            | 4.06                       |
| 1984 | 265.74                                           | 3,656,222       | 3,827,241        | 15.7                            | 3.72                       |
| 1983 | 215.68                                           | 3,627,205       | 3,723,706        | 16.0                            | 4.01                       |
| 1982 | 187.02                                           | 3,587,977       | 3,740,530        | 16.1                            | 3.13                       |
| 1981 | 170.51                                           | 3,546,375       | 3,700,885        | 15.7                            | 3.81                       |
| 1980 | 140.88                                           | 3,509,082       | 3,782,602        | 15.5                            | 4.43                       |
| 1979 | 127.31                                           | 3,443,268       | 3,866,462        | 15.5                            | 3.34                       |
| 1978 | 113.96                                           | 3,383,684       | 3,817,259        | 16.1                            | 2.95                       |
| 1977 | 108.01                                           | 3,322,976       | 3,979,530        | 15.5                            | 4.30                       |
| 1976 | 105.77                                           | 3,276,238       | 4,007,834        | 15.3                            | 3.20                       |
| 1975 | 97.01                                            | 3,227,452       | 3,944,996        | 15.7                            | 3.99                       |
| 1974 | 91.44                                            | 3,165,123       | 3,875,150        | 15.5                            | 3.47                       |
| 1973 | 92.18                                            | 3,100,620       | 3,933,748        | 15.8                            | 3.66                       |
| 1972 | 85.88                                            | 3,025,268       | 3,981,319        | 15.2                            | 3.58                       |
| 1971 | 79.99                                            | 2,927,524       | 3,926,281        | 15.1                            | 3.21                       |
| 1970 | 71.79                                            | 2,844,869       | 3,855,327        | 15.3                            | 3.94                       |
| 1969 | 58.09                                            | 2,757,096       | 3,752,249        | 15.4                            | 3.60                       |
| 1968 | 56.09                                            | 2,658,055       | 3,923,243        | 15.6                            | 2.91                       |
| 1967 | 56.88                                            | 2,557,064       | 3,919,254        | 15.9                            | 2.97                       |
| 1966 | 59.82                                            | 2,436,149       | 3,885,978        | 16.1                            | 2.93                       |
| 1965 | 52.75                                            | 2,409,735       | 3,919,522        | 15.5                            | 3.08                       |
| 1964 | 44.97                                            | 2,384,779       | 4,077,038        | 15.7                            | 3.74                       |
| 1963 | 40.81                                            | 2,394,296       | 4,194,893        | 15.8                            | 3.64                       |
| 1962 | 39.47                                            | 2,319,538       | 4,175,577        | 15.7                            | 3.47                       |
| 1961 | 43.65                                            | 2,263,666       | 4,209,034        | 16.3                            | 3.72                       |
| 1960 | 59.76                                            | 2,335,700       | 4,467,981        | 16.2                            | 3.49                       |
| 1959 | 57.97                                            | 2,645,932       | 4,434,017        | 15.5                            | 3.33                       |
| 1958 | 51.31                                            | 2,657,543       | 4,693,872        | 15.6                            | 3.54                       |
| 1957 | 41.37                                            | 2,601,733       | 4,760,084        | 15.7                            | 3.97                       |
| 1956 | 35.27                                            | 2,550,547       | 4,979,452        | 14.8                            | 3.80                       |
| 1955 | 37.15                                            | 2,479,520       | 4,732,867        | 15.9                            | 3.41                       |
| 1954 | 27.76                                            | 2,438,169       | 4,493,172        | 15.5                            | 3.03                       |
| 1953 | 26.99                                            | 2,377,928       | 4,453,268        | 15.7                            | 3.28                       |
| 1952 | 22.88                                            | 2,336,177       | 4,497,722        | 16.1                            | 3.38                       |
| 1951 | 22.52                                            | 2,314,447       | 4,263,230        | 15.1                            | 2.72                       |
| 1950 | 17.32                                            | 2,245,101       | 4,157,830        | 14.2                            | 4.12                       |
